# Supplementary material for: Deep learning-based phenotyping reclassifies combined hepatocellular-cholangiocarcinoma
Source: PubMed Central journal article supplement (PMC10719304; doi:10.1038/s41467-023-43749-3), 2023-12-14
Supplement: 41467_2023_43749_MOESM3_ESM.pdf [file 41467_2023_43749_MOESM3_ESM.pdf]

## Description of Additional Supplementary Files

**Supplementary Data 1:** For all six cases analyzed with in situ gene expression profiles available, the differential gene expression between the 100 ICCA-high prediction and 100 HCC-high prediction patches for each case is listed here.
